# Supplementary material for: Does recall period matter? Comparing PROMIS® physical function with no recall, 24-hr recall, and 7-day recall
Source: Springer Nature journal article supplement (doi:10.1007/s11136-019-02344-0), 2019-11-07
Supplement: MOESM1 [file 17363454]

**This is an online appendix to Condon et al: Does Recall Period Matter? Comparing PROMIS® physical function with no recall, 24-hour recall, and 7-day recall**

**DIF Recall-period Analyses of the General Population vs. Cancer Patient PF-Oncology Response Data (M Kallen)**

**Introduction**

We investigated two differential item functioning (DIF) factors in our PF-Oncology 31-item response data set: (1) time context (no recall time period vs. a 7-day recall period); and (2) sub-group status (general population vs. cancer patient) in time-context-controlled data subsets (i.e., with “7-day recall” cases only; with “no recall” cases only). Our goal was to determine whether the tested recall time periods influenced item performance either within or across general population cases or cancer patients. If no such influence was discovered, then use of the current item response theory (IRT)-based PF item calibrations would remain appropriate for PF-Oncology measure configuration and scoring.

**Our Methods**

The 31 items of the PF-Oncology item set were administered to general population cases and cancer patients, using differing recall time period contexts. Of interest here were the no recall time period context and the 7-day recall context (i.e., “In the past 7 days”). The 7-day recall time context was presented in two ways: (1) as part of the introduction and instructions for responding to items, and then with the time context re-presented for each item administered (i.e., with time context “reminders”); (2) only as part of the introduction and response instructions and not re-presented for other items (i.e., no “reminders”). Table 1 presents the planned DIF analyses, including reference group and focal group identification and sample sizes.

**Table 1. Planned Analyses: Reference and Focal Groups**

| **Cancer only: No recall vs. 7-day** | |  |  |  |  |  |
| --- | --- | --- | --- | --- | --- | --- |
| **Analysis** | **Context** | **Reference group** | **n** |  | **Focal group** | **n** |
| **1a** | Cancer pts | No recall | 201 | vs. | 7-day: intro/reminder | 200 |
| **1b** | Cancer pts | No recall | 201 | vs. | 7-day: intro only | 200 |
| **1c** | Cancer pts | No recall | 201 | vs. | 7-day: both conditions | 400 |
|  |  |  |  |  |  |  |
| **Gen Pop only: No recall vs. 7-day** | |  |  |  |  |  |
| **Analysis** | **Context** | **Reference group** | **n** |  | **Focal group** | **n** |
| **2a** | General pop | No recall | 598 | vs. | 7-day: intro/reminder | 200 |
| **2b** | General pop | No recall | 598 | vs. | 7-day: intro only | 200 |
| **2c** | General pop | No recall | 598 | vs. | 7-day: both conditions | 400 |
|  |  |  |  |  |  |  |
| **7-day only: Gen Pop vs. Cancer** | |  |  |  |  |  |
| **Analysis** | **Context** | **Reference group** | **n** |  | **Focal group** | **n** |
| **3a** | 7-day: intro/reminder | Gen Pop | 200 | vs. | Cancer | 200 |
| **3b** | 7-day: intro only | Gen Pop | 200 | vs. | Cancer | 200 |
| **3c** | 7-day: both conditions | Gen Pop | 400 | vs. | Cancer | 400 |
|  |  |  |  |  |  |  |
| **No recall only: Gen Pop vs. Cancer** | | |  |  |  |  |
| **Analysis** | **Context** | **Reference group** | **n** |  | **Focal group** | **n** |
| **4** | No recall | Gen Pop | 598 | vs. | Cancer | 201 |

Typical sample size requirements for IRT-based DIF analyses are a minimum of N = 500 for total sample size and a minimum of n = 200 for each subgroup tested. Although all of our planned analyses met subgroup sample size recommendations, Analyses 1a, 1b, 3a, and 3b had total sample sizes of approximately N = 400 and therefore might be considered more exploratory in nature than definitive.

We implemented a hybrid logistic ordinal regression (LOR) and IRT approach to DIF detection. This included use of an IRT-derived ability score for LOR modeling rather than the traditionally modeled summed-score ability term. For part one of our DIF analyses, we sought to identify items flagged for DIF by our investigated DIF factors (i.e., no recall vs. 7-day recall time context; time-context-controlled subgroup status (general population vs. cancer patients). We used a McFadden pseudo-R2 change criterion of ≥ 0.02 to flag items for DIF. For part two of our DIF analyses, we studied the potential score impact of using a common set of item parameters for scoring vs. group-specific item parameters for any items flagged for DIF. We conducted unadjusted (i.e., using a common set of item parameters) vs. DIF-adjusted (using a common subset of item parameters plus group-specific item parameters for flagged items) score difference analyses to obtain scoring impact evidence: (a) Pearson correlation (unadjusted vs. adjusted scores), (b) mean difference (unadjusted minus adjusted score), (c) standard deviation (SD) of the score differences, (d) root mean squared difference (RMSD) of the score differences, and (e) percentage of individual case score differences greater than their associated unadjusted score standard error (SE). We used the lordif R package (version 0.3-3) and the statistical program IBM SPSS (version 25.0.0.1) for conducting our analyses. All scores and score-related statistics are reported in or based on the theta metric (mean=0; SD=1).

**Our Results**

A total of 2,400 persons participated in the PF-Oncology recall period time context study (n=1,399 general population cases; n=1,001 cancer patients). Table 1 presents the specific subgroup sample ns. No participants had incomplete PF-Oncology item response data. For part one of our DIF analyses, no items were flagged for DIF for: (a) cancer patient only no recall vs. 7-day recall analyses; (b) general population only no recall vs. 7-day recall analyses; (c) no recall only general population vs. cancer patients. For the 7-day recall only general population vs. cancer patients analyses, from one to four items were flagged for DIF per analysis (see Table 2).

**Table 2. Items Flagged for DIF**

| **Cancer only: No recall vs. 7-day** | |  |  |  |
| --- | --- | --- | --- | --- |
| **Analysis** | **Context** | **Reference group** | **Focal group** | **Items flagged for DIF** |
| **1a** | Cancer pts | No recall | 7-day: intro/reminder | (none) |
| **1b** | Cancer pts | No recall | 7-day: intro only | (none) |
| **1c** | Cancer pts | No recall | 7-day: both conditions | (none) |
|  |  |  |  |  |
| **Gen Pop only: No recall vs. 7-day** | |  |  |  |
| **Analysis** | **Context** | **Reference group** | **Focal group** | **Items flagged for DIF** |
| **2a** | General pop | No recall | 7-day: intro/reminder | (none) |
| **2b** | General pop | No recall | 7-day: intro only | (none) |
| **2c** | General pop | No recall | 7-day: both conditions | (none) |
|  |  |  |  |  |
| **7-day only: Gen Pop vs. Cancer** | |  |  |  |
| **Analysis** | **Context** | **Reference group** | **Focal group** | **Items flagged for DIF** |
| **3a** | 7-day: intro/reminder | Gen Pop | Cancer | PFA1,PFA45,PFB26,PFC12 |
| **3b** | 7-day: intro only | Gen Pop | Cancer | PFA1 |
| **3c** | 7-day: both conditions | Gen Pop | Cancer | PFA1 |
|  |  |  |  |  |
| **No recall only: Gen Pop vs. Cancer** | | |  |  |
| **Analysis** | **Context** | **Reference group** | **Focal group** | **Items flagged for DIF** |
| **4** | No recall | Gen Pop | Cancer | (none) |

Table 3 presents the item content and difficulty ranking of items flagged for DIF in the 7-day recall only general population vs. cancer patients analyses. From among the 31 items of the PF-Oncology item set, the items flagged for potential DIF were the second and third most easy items to endorse, in terms of physical functioning status, and the first and second most hard items to endorse.

**Table 3. Items Flagged for DIF: Content and Difficulty Ranking**

|  |  | **Difficulty Rank:** |
| --- | --- | --- |
| **Item ID** | **Content** | **Easier to harder** |
| PFA45 | Are you able to get out of bed into a chair? | 2 |
| PFB26 | Are you able to shampoo your hair? | 3 |
| PFC12 | Does your health now limit you in doing two hours of physical labor? | 30 |
| PFA1 | Does your health now limit you in doing vigorous activities, such as running, lifting heavy objects, participating in strenuous sports? | 31 |

It is worth noting that the distribution of physical functioning status differs considerably between the general population vs. cancer patient samples. Figure 1, which presents the physical functioning status distributions from DIF Analysis 3a, illustrates this difference. It is not unreasonable to consider that the item parameters for the easiest items from among the 31 PF-Oncology items are perhaps differently and more accurately estimated by the cancer patient sample than by the general population sample, which has few cases at the lower “easy item” end of the distribution. Conversely, the hardest of the PF-Oncology items are perhaps differently and more accurately estimated by the general population sample than by the cancer patient sample, which has few cases at the upper “hard item” end of the distribution. Thus, physical functioning status distributional differences between the general population and cancer patient samples may have influenced the flagging of items for potential DIF.

**Figure 1. Physical Function Trait Distributions: Gen Pop vs. Cancer**


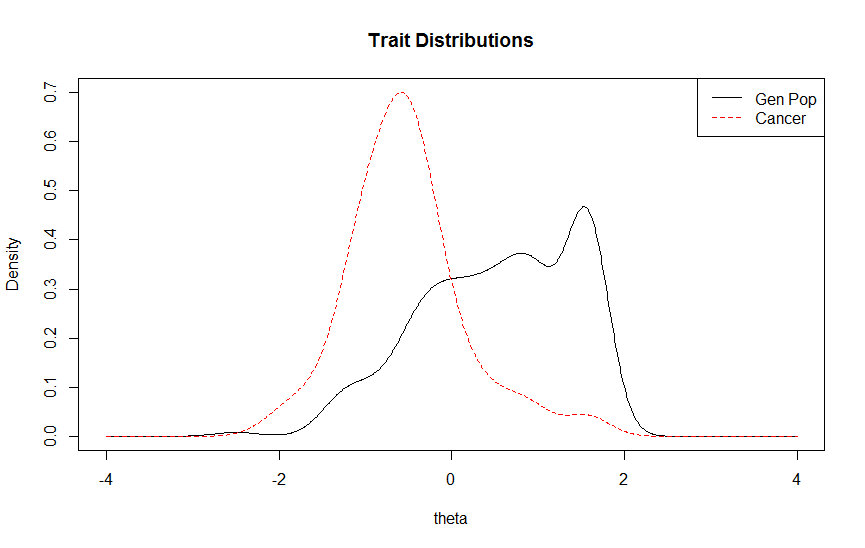


For part two of our DIF analyses, score impact studies used results only from those analyses that flagged items for potential DIF (i.e., only the 7-day recall-specific general population cases vs. cancer patients). Statistical findings from our part two DIF analyses are presented in Table 4 per DIF analysis, by total group and by subgroup. The Pearson correlation between unadjusted vs. DIF-adjusted scores, across all analyses and groups/subgroups, was 1.00. All mean score differences approached 0 and ranged from 0.0018 to 0.0090. Score difference SDs were very small and ranged from 0.0015 to 0.0225. RMSDs were also very small and ranged from 0.0000 to 0.0245. For individual score differences (unadjusted minus adjusted), 0% of cases, across all analyses and groups/subgroups, exceeded their own unadjusted score’s SE.

**Table 4. Score Impact When Adjusting for Flagged DIF Items**

| **7-day only: Gen Pop vs. Cancer** | |  |  |  |  |  |  |
| --- | --- | --- | --- | --- | --- | --- | --- |
| **Analysis** | **Group** | **n** | **Pearson *r*** | **Mean Diff** | **SD Diff** | **RMSD** | **Diff > SE (Unadj)** |
| 3a: 7-day (intro + reminders) | Total | 400 | 1.00 | 0.0054 | 0.0167 | 0.0173 | 0% of cases |
|  | Gen Pop | 200 | 1.00 | 0.0090 | 0.0225 | 0.0245 | 0% of cases |
|  | Cancer | 200 | 1.00 | 0.0018 | 0.0049 | 0.0000 | 0% of cases |
|  |  |  |  |  |  |  |  |
| 3b: 7-day (intro only) | Total | 400 | 1.00 | 0.0021 | 0.0114 | 0.0100 | 0% of cases |
|  | Gen Pop | 200 | 1.00 | 0.0024 | 0.0161 | 0.0173 | 0% of cases |
|  | Cancer | 200 | 1.00 | 0.0018 | 0.0020 | 0.0000 | 0% of cases |
|  |  |  |  |  |  |  |  |
| 3c: 7-day (both conditions) | Total | 800 | 1.00 | 0.0023 | 0.0114 | 0.0100 | 0% of cases |
|  | Gen Pop | 400 | 1.00 | 0.0027 | 0.0161 | 0.0173 | 0% of cases |
|  | Cancer | 400 | 1.00 | 0.0018 | 0.0015 | 0.0000 | 0% of cases |

**Conclusions**

The tested recall time period, no recall vs. 7-day recall, was not a DIF factor for cancer patients only or for general population cases only. The tested subgroup status, general population vs. cancer patient, was also not a DIF factor for no recall time period response data. For 7-day recall time period responses, from one to four items were flagged for potential DIF when testing the DIF factor of subgroup status (general population vs. cancer patient). However, the actual impact of flagged DIF items on PF-Oncology scores, comparing unadjusted vs. DIF-adjusted scoring approaches, was trivial. Score correlations were perfect (*r* = 1.00), and RMSD values for cancer patients were essentially unmeasurable when using up to four decimal places of accuracy. RMSDs for general population cases had a maximum value of approximately 0.02 on the theta metric, which would be 0.2 points on a T-score metric. Thus, potential biasing effects from using current PF item parameters for the PF-Oncology items, when used with cancer patients under time context conditions of no recall or 7-day recall, appear negligible.
